# Supplementary material for: A metallosupramolecular polymer deposited via inkjet printing for fast-switching pixelated electrochromic devices
Source: Royal Society of Chemistry journal article supplement (doi:10.1039/d1tc04462a), 2022-01-01
Supplement: d1tc04462a1.pdf [file d1tc04462a1.pdf]

## Supporting Information

### **Metallosupramolecular polymer deposited via inkjet printing for fast-switching pixelated electrochromic devices**

Li-Juan Xu, Bing Li, Guo-Lin Gao\*, Zaixing Jiang\*

MIIT Key Laboratory of Critical Materials Technology for New Energy Conversion and Storage, School of Chemistry and Chemical Engineering, Harbin Institute of Technology, Harbin 150001, P. R. of China.

\*Corresponding author: gaoguo@hit.edu.cn; jiangzaixing@hit.edu.cn.

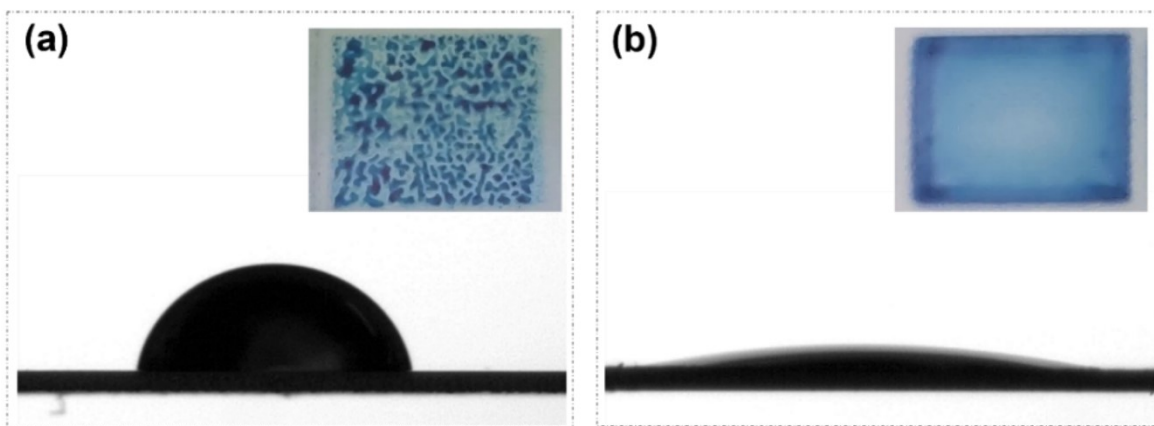

**Figure S1.** Contact angel of Fe(II)-MEPE polymer inks with (a) water (b) ethanol as solvent on ITO-coated PET substrate (the insets were the typical photograph of the printed film).

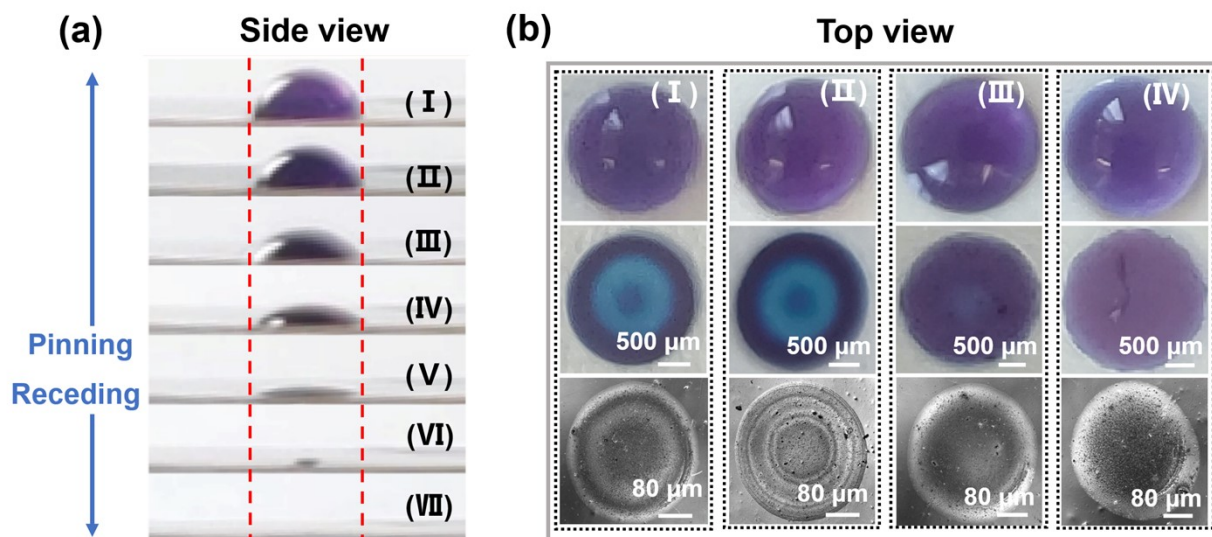

**Figure S2.** (a) The side view images of Fe(II)-MEPE polymer droplet with water as solvent during drying process on the ITO-coated PET substrate. (b) The top view images of 2  $\mu\text{L}$  Fe(II)-MEPE polymer droplets with water, ethanol, ethylene glycol, and water/ethanol/ethylene glycol (volume ratio of 100:50:10) as solvent from I to IV (top) and the top view images of dried Fe(II)-MEPE droplets (middle). The top view images of sub-microliter Fe(II)-MEPE droplets deposited (bottom).

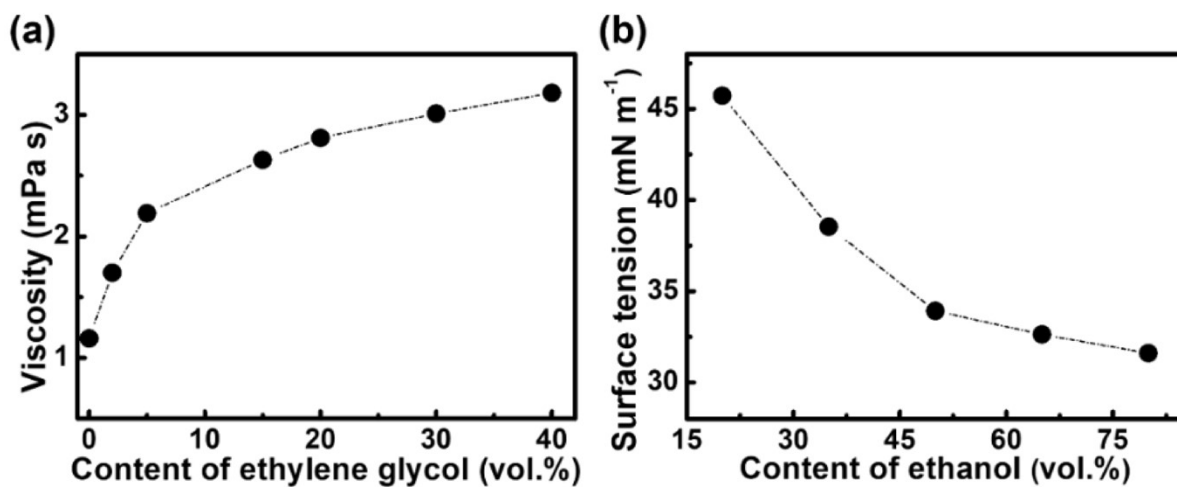

**Figure S3.** (a) The viscosity of Fe(II)-MEPE inks (with a fixed concentrate of 1 mg mL<sup>-1</sup>) with different content ethylene glycol relative to water. (b) The surface tension of Fe(II)-MEPE inks with different content ethanol relative to volent of water.

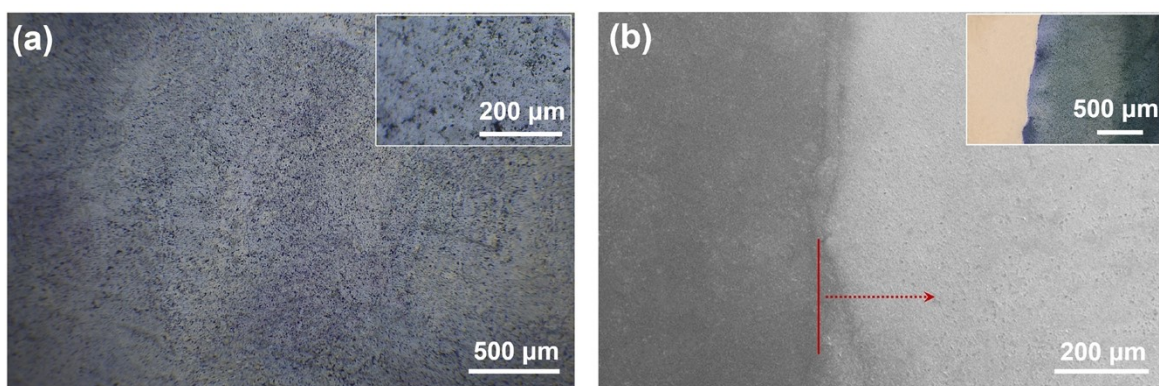

**Figure S4.** (a) A microscope image of the surface morphology of the inkjet-printed Fe(II)-MEPE film at a magnification of 4 × 16 (inset presents an image at a magnification of 10 × 16); (b) The SEM image of the boundary part of the inkjet-printed Fe(II)-MEPE polymer film (the inset was the optical microscope image).

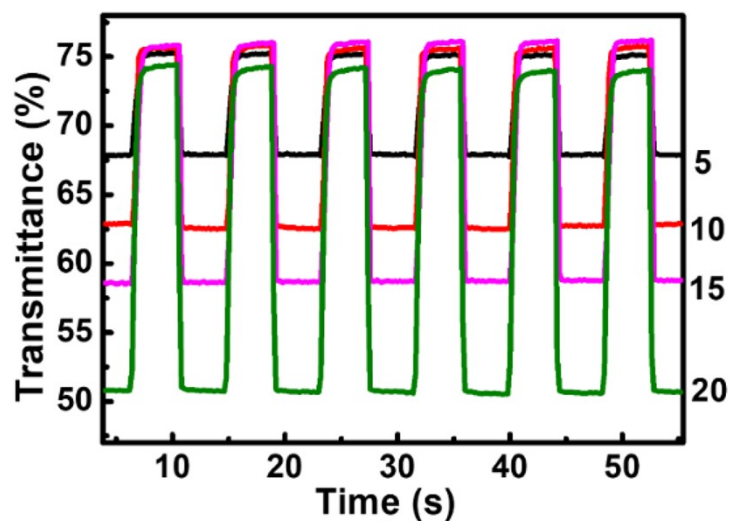

**Figure S5.** Electrochromic switching behavior of electrochromic films with different printed layers of Fe(II)-MEPE polymer monitored at 584 nm at a voltage of 0 V for 4 s and +1.4 V for 4 s for cycles.

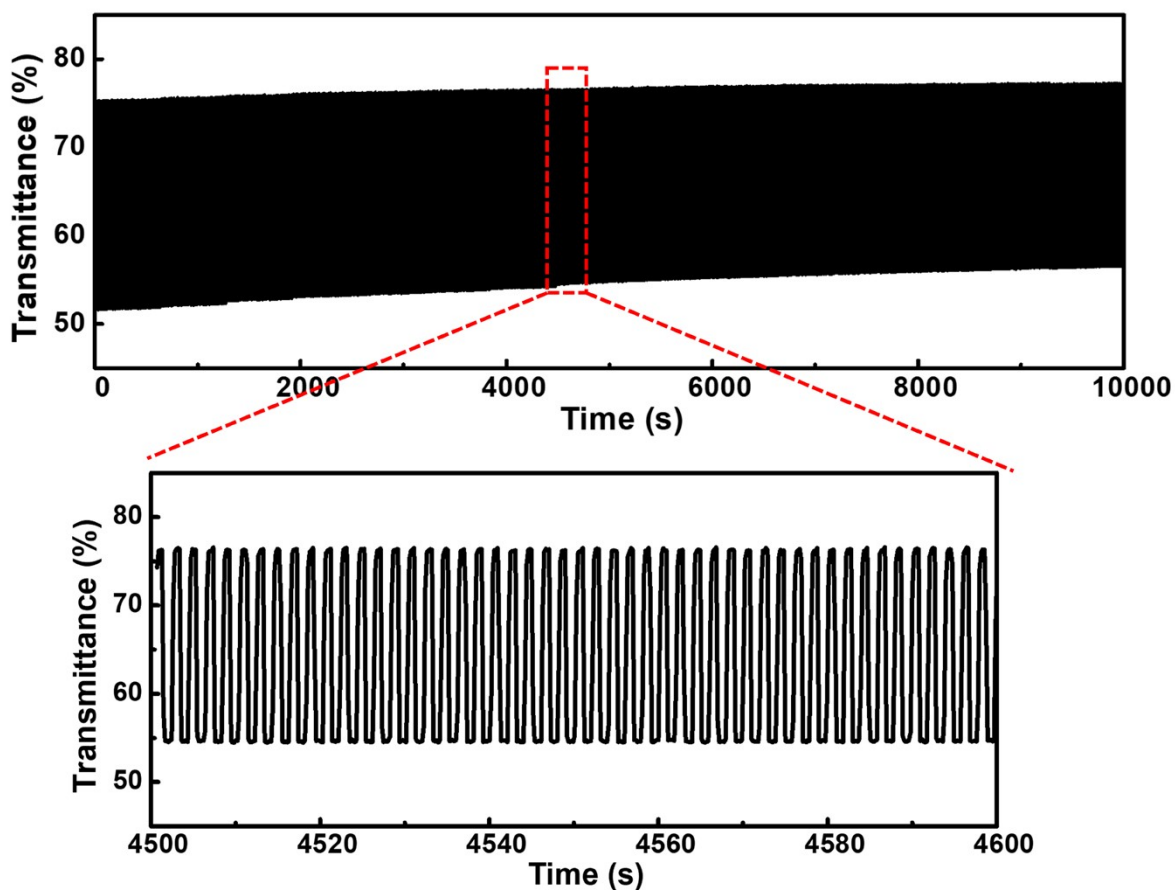

**Figure S6.** Transient transmittance profile at 584 nm during continuous coloration/bleaching switching 5000 cycles of the printed Fe(II)-MEPE polymer film.

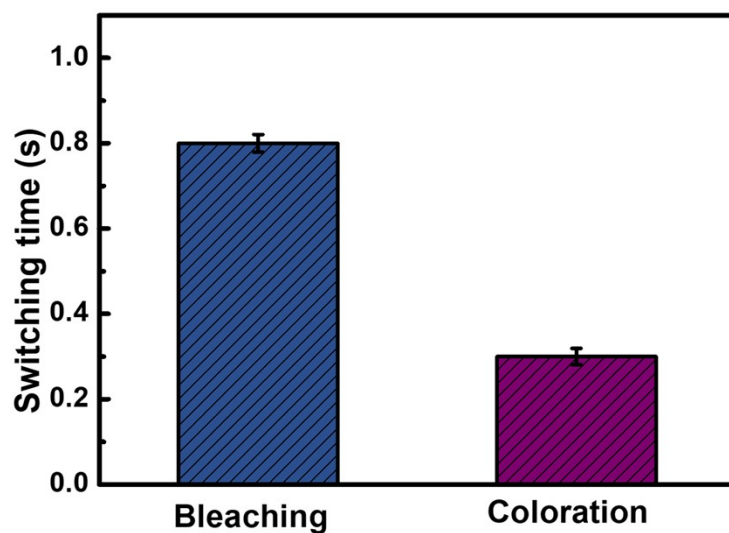

Figure S7. The Fe(II)-MEPE film switching speed histogram

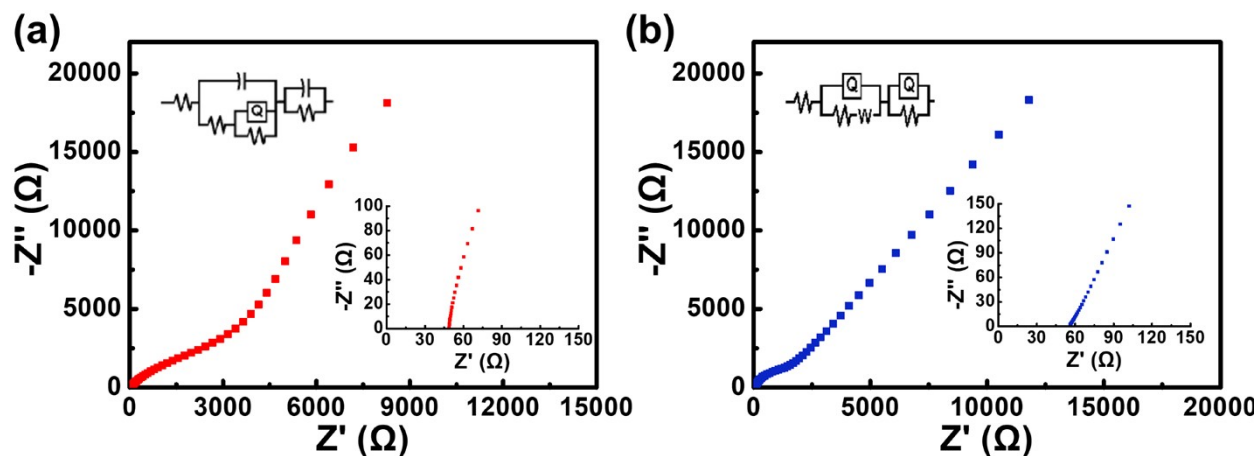

Figure S8. The AC impedance spectra of the ITO-coated PET electrode and the inkjet-printed Fe(II)-MEPE film in the presence of 0.1 M TBAClO<sub>4</sub>/ACN.

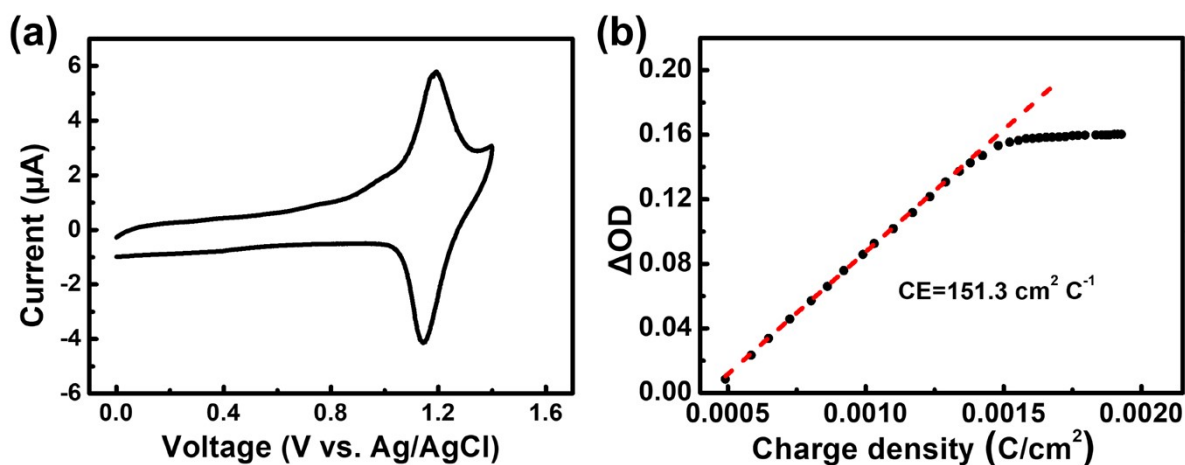

**Figure S9.** (a) CV (scan rate: 20 mV/s) and (b) plot of the optical density ( $\Delta OD$ ) versus the injected charge density for the printed Fe(II)-MEPE film. The coloration efficiency (CE) was extracted from the slope of the linear fitting in the linear scheme of the plot.

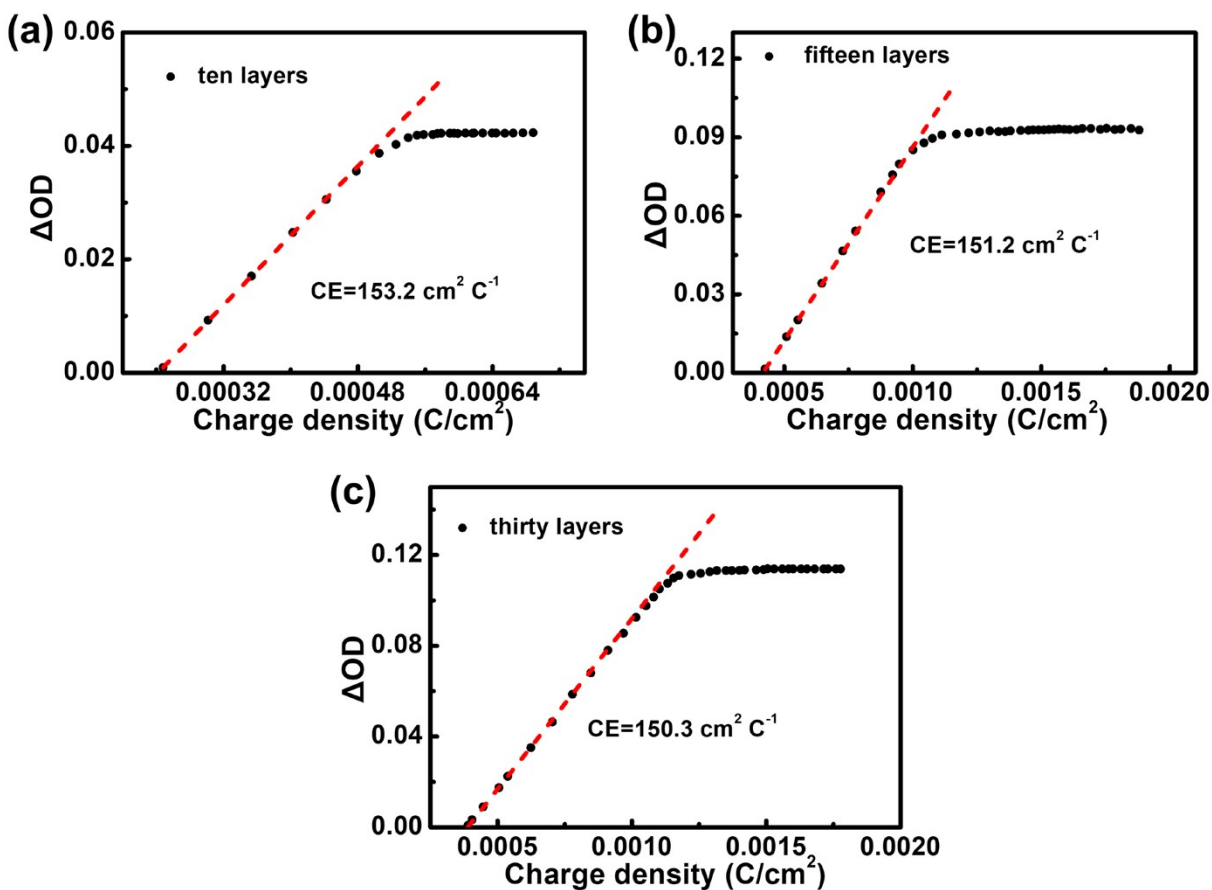

**Figure S10.** The coloration efficiency of printed Fe(II)-MEPE films in different layers

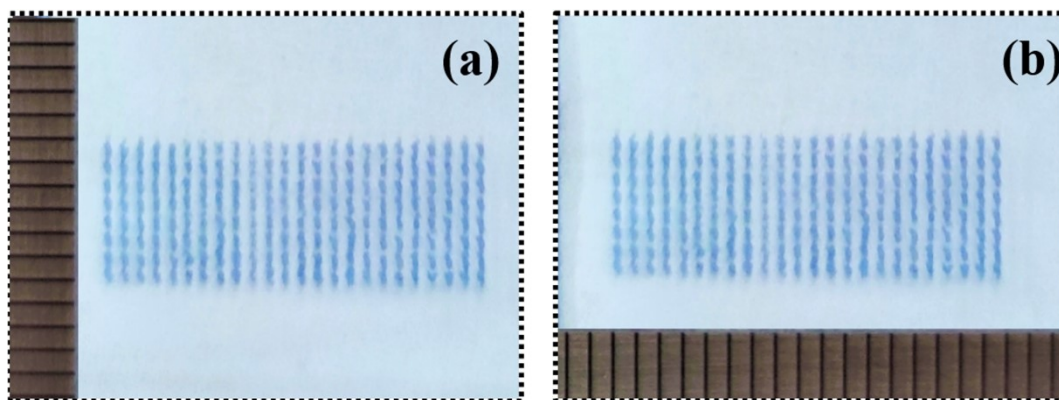

**Figure S11.** The pixelated Fe(II)-MEPE film with  $8 \times 24$  arrays composed of dot pixels ( $\sim 350 \mu\text{m} \times 700 \mu\text{m}$ ) on ITO-coated PET surface (the minimum scale of the ruler is 1.0 mm).

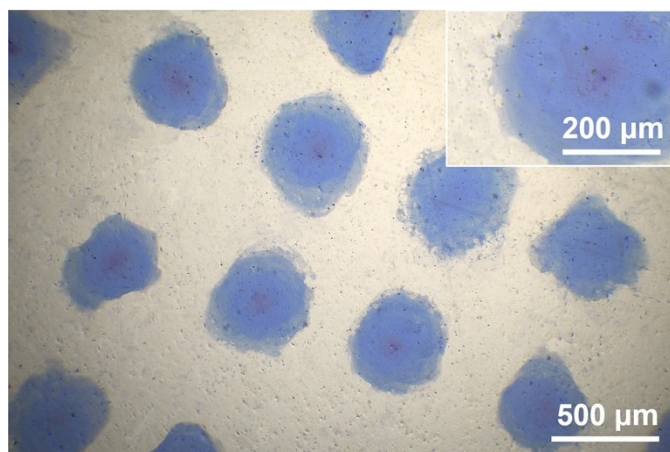

**Figure S12.** A microscope image of the surface appearance of the inkjet-printed pixels on an ITO-coated PET film using the Fe(II)-MEPE polymer in ternary solvent at a magnification of  $4 \times 16$  (inset presents an image at a magnification of  $10 \times 16$ ).

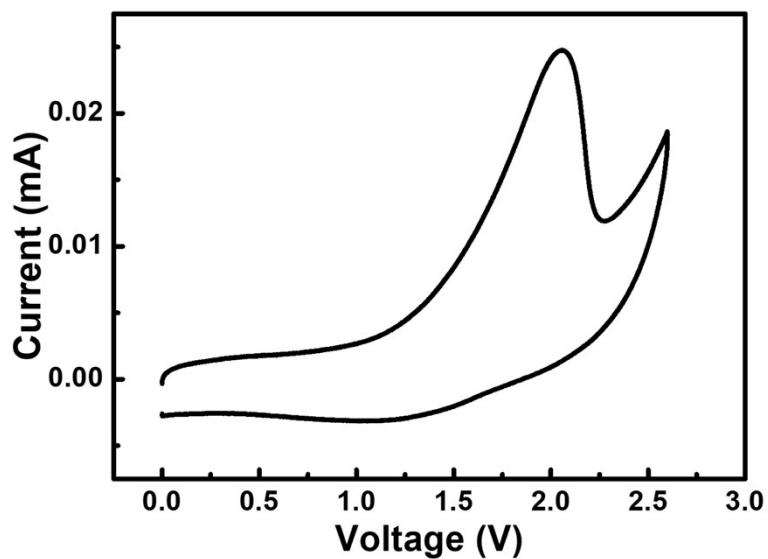

**Figure S13.** The cyclic voltammetry curve (scan rate: 20 mV/s) of the PECD.

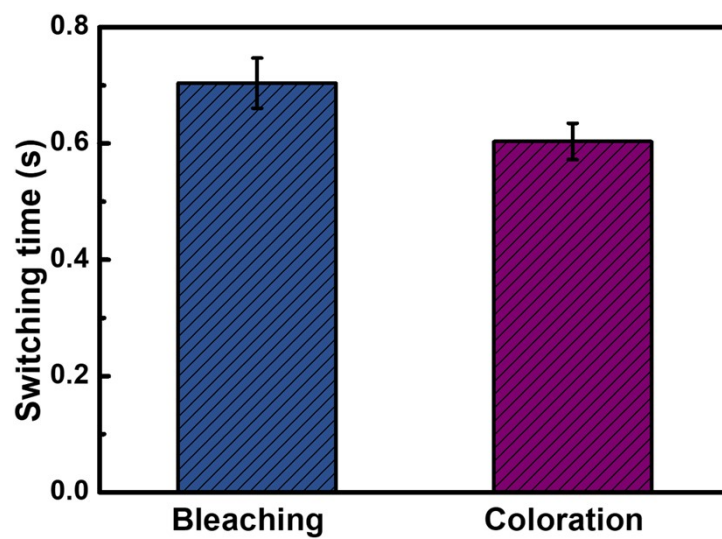

**Figure S14.** The PECD switching speed histogram.



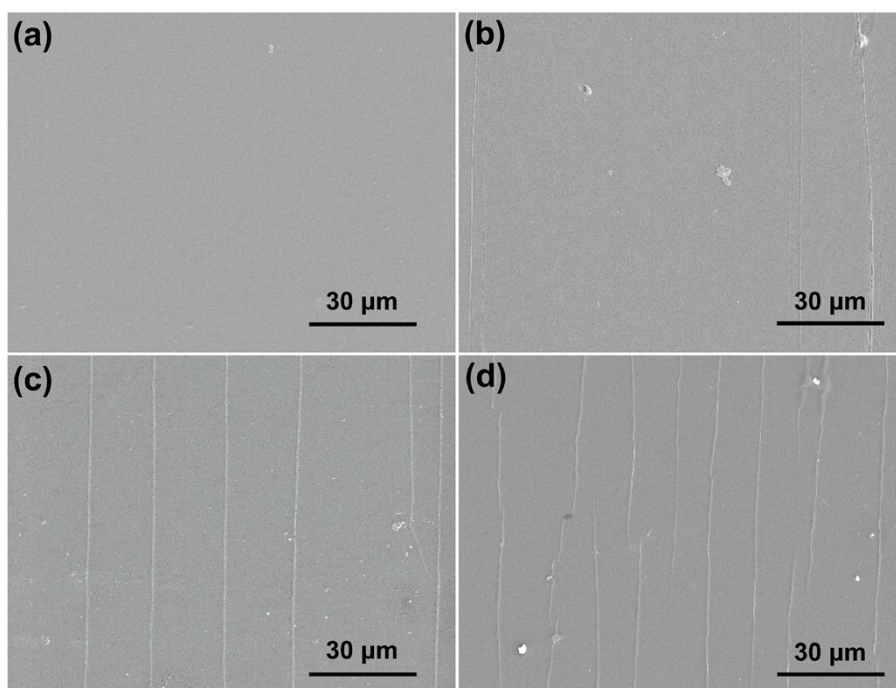

**Figure S15.** SEM images of ITO-coated PET substrate according to the bending cycles ((a) 0 s, (b) 800 s, (c) 1600 s, and (d) 2400 s).

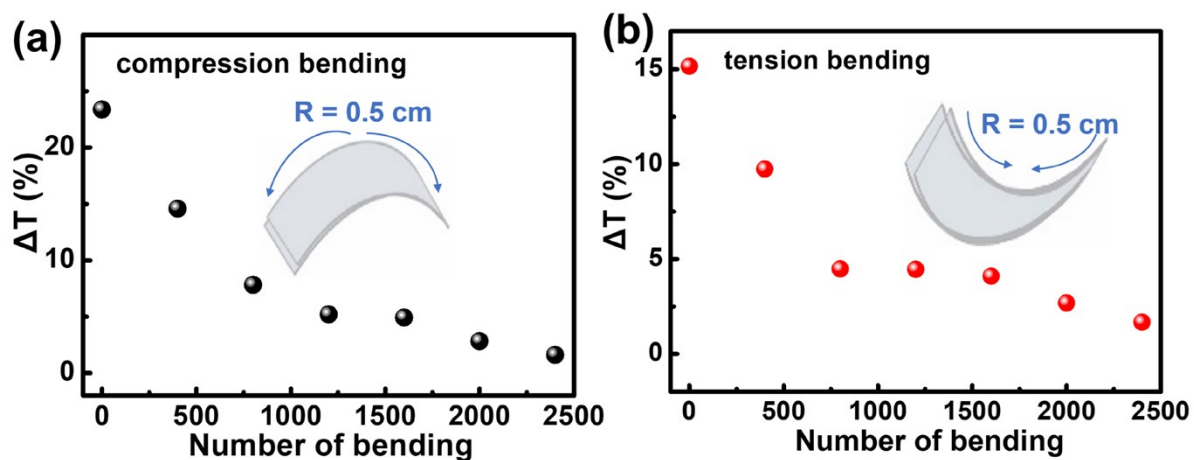

**Figure S16.** (a, b) Changes of  $\Delta T$  in film ECD as a function of number of compression and tension bending cycles (bending radius 5 mm).

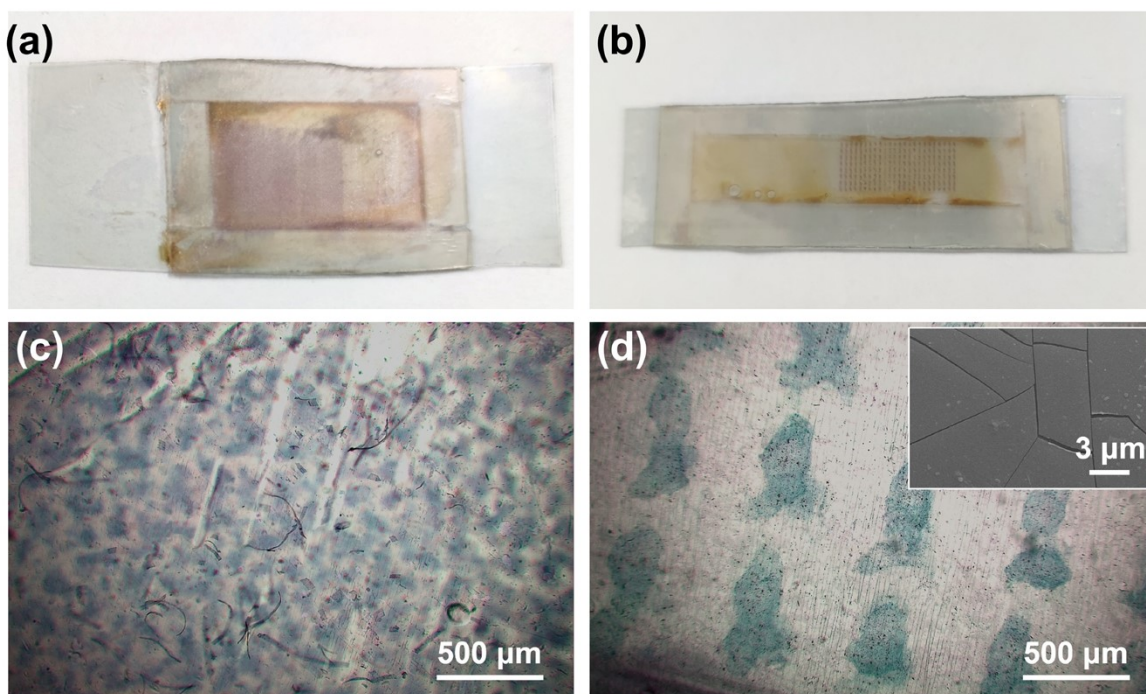

**Figure S17.** Photographs and optical microscope images at a magnification of  $4 \times 16$ : (a and c) printed film ECD and (b and d) PECD after 2400 bending cycles (inset showed the SEM image of pixelated Fe(II)-MEPE after 2400 bending cycles).

**Table S1.** The physical parameters of the alternative main solvents and inks.

| ink                                         | viscosity (mPa s) | surface tension (mN m <sup>-1</sup> ) |
|---------------------------------------------|-------------------|---------------------------------------|
| water                                       | 0.8               | 71.9                                  |
| ethylene glycol                             | 17.3              | 48.4                                  |
| ethanol                                     | 1.1               | 21.9                                  |
| original ink                                | 2.1               | 36.8                                  |
| water/ethanol/ethylene glycol<br>(100:50:5) | 2.2               | 33.9                                  |

**Table S2.** The ratio of Fe(II)-for viscosity

| number | water (mL) | ethanol (mL) | ethylene glycol (mL) |
|--------|------------|--------------|----------------------|
| 1      | 100        | 50           | 0                    |
| 2      | 100        | 50           | 2                    |
| 3      | 100        | 50           | 5                    |
| 4      | 100        | 50           | 15                   |
| 5      | 100        | 50           | 20                   |
| 6      | 100        | 50           | 30                   |
| 7      | 100        | 50           | 40                   |

specific solvent MEPE inks used testing.

**Table S3.** The specific solvent ratio of Fe(II)-MEPE inks used for surface tension testing.

| number | water (mL) | ethanol (mL) | ethylene glycol (mL) |
|--------|------------|--------------|----------------------|
| 1      | 100        | 20           | 5                    |
| 2      | 100        | 35           | 5                    |
| 3      | 100        | 50           | 5                    |
| 4      | 100        | 65           | 5                    |
| 5      | 100        | 80           | 5                    |

**Table S4.** The EIS fitting results of the electrode.

| electrode                  | $R_s$<br>( $\Omega \cdot \text{cm}^2$ ) | $R_{ct1}$<br>( $\Omega \cdot \text{cm}^2$ ) | $R_{ct2}$<br>( $\Omega \cdot \text{cm}^2$ ) | $W$<br>( $\Omega \cdot \text{cm}^2$ ) | $R_{ct3}$<br>( $\Omega \cdot \text{cm}^2$ ) |
|----------------------------|-----------------------------------------|---------------------------------------------|---------------------------------------------|---------------------------------------|---------------------------------------------|
| ITO-coated PET film        | 48.9                                    | 12.5                                        | $5.9 \times 10^3$                           | —                                     | $9.8 \times 10^4$                           |
| printed Fe( II )-MEPE film | 55.1                                    | $1.0 \times 10^3$                           | $7.8 \times 10^{13}$                        | $7 \times 10^4$                       | —                                           |
